# Supplementary material for: Interaction of solid lipid nanoparticles with bovine serum albumin: physicochemical mechanistic insights
Source: Royal Society of Chemistry journal article supplement (doi:10.1039/d4cp04737k), 2025-01-01
Supplement: d4cp04737k1.pdf [file d4cp04737k1.pdf]

**Interaction of Solid Lipid Nanoparticles with Protein: A Mechanistic  
Calorimetric and Spectroscopic Approach**

Jyoti Rathee, Nand Kishore\*

Department of Chemistry, Indian Institute of Technology Bombay, Powai, Mumbai 400076, India

**\*Corresponding author:**

Prof. Nand Kishore, Department of Chemistry, Indian Institute of Technology Bombay, Powai, Mumbai 400  
076, India

Email: [nandk@chem.iitb.ac.in](mailto:nandk@chem.iitb.ac.in)

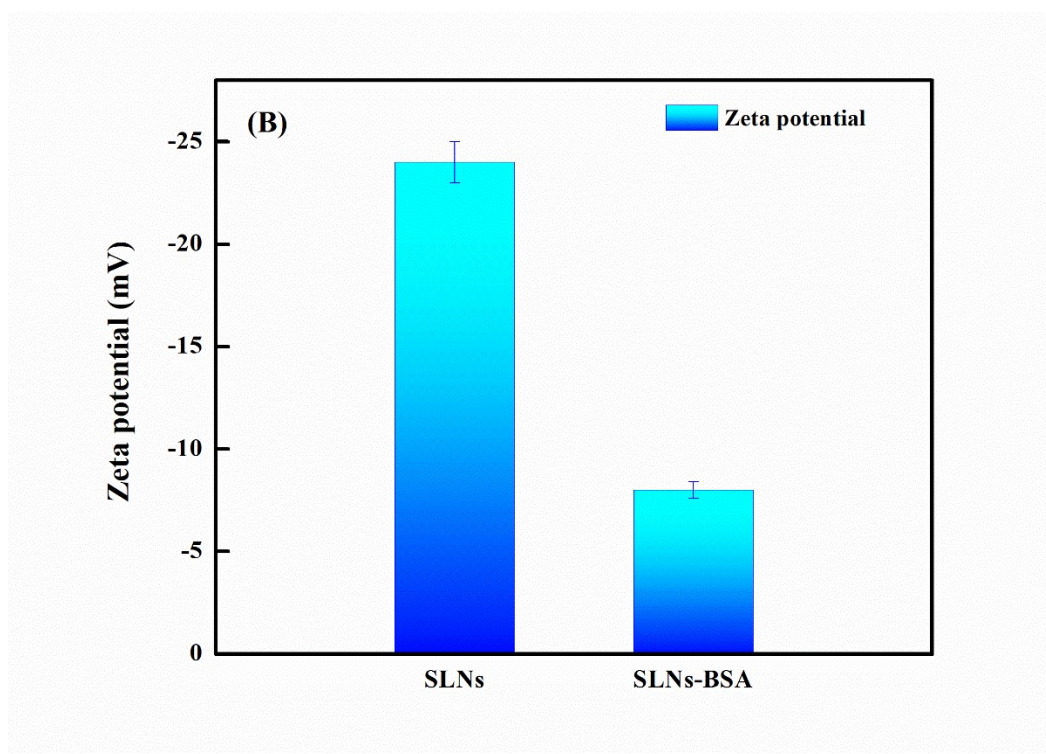

Figure S1: Zeta potential of the (A) SLNs and (B) SLNs-BSA

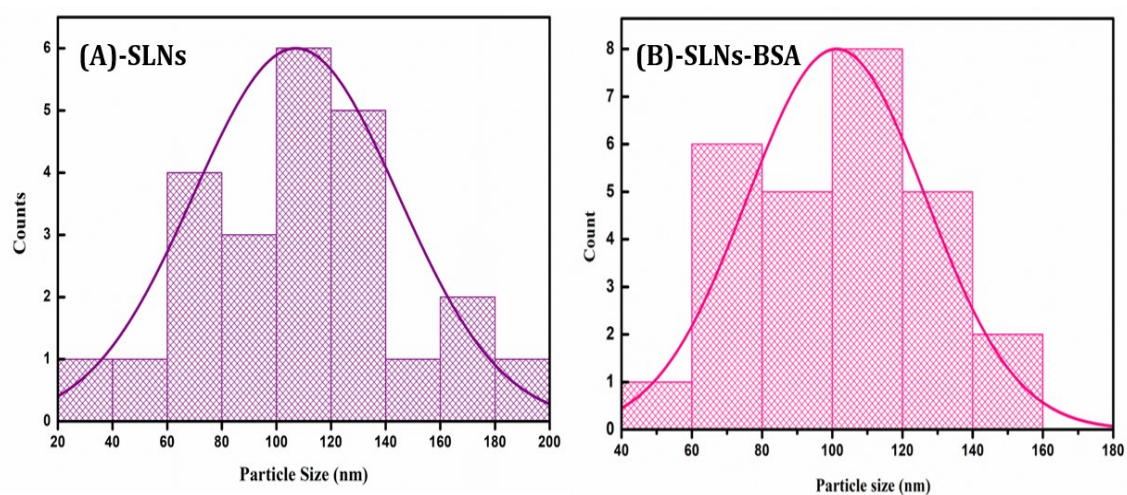

Figure S2: Histogram of SLNs and SLNs-BSA TEM images

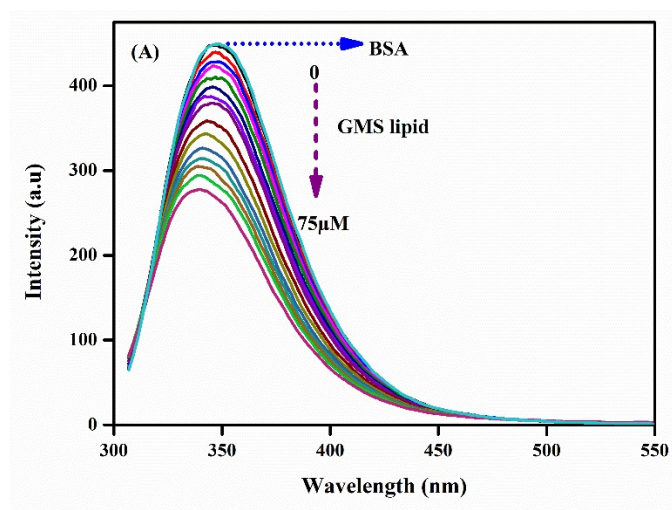

Figure S3: Fluorescence emission spectra of bovine serum albumin (BSA) with increasing (A) concentration of GMS lipid and at 298 K

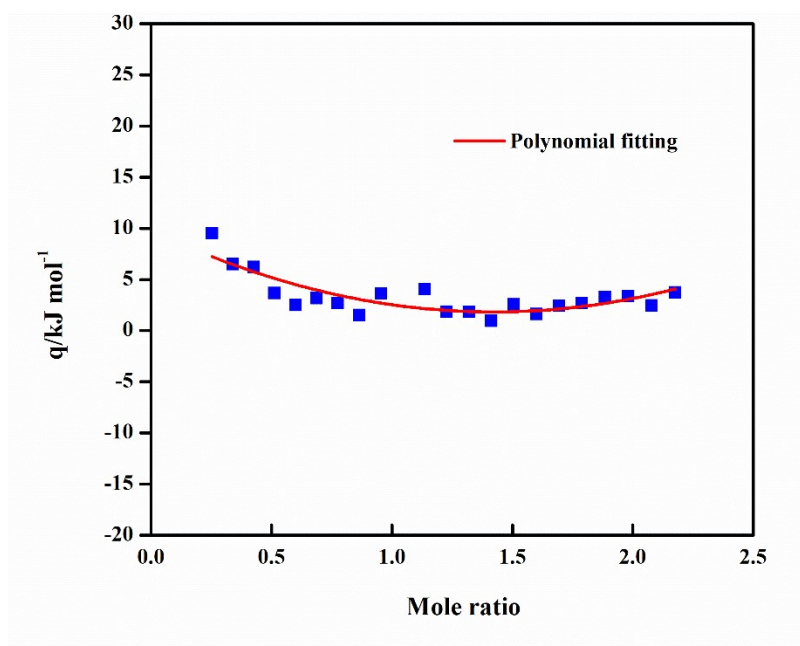

Figure S4: Polynomial fitting (second degree) on ITC profile at 298.15 K
